# Supplementary material for: Biomimetic FeCo@PDA nanozyme platform with Fenton catalytic activity as efficient antibacterial agent
Source: Royal Society of Chemistry journal article supplement (doi:10.1039/d2tb00588c), 2022-01-01
Supplement: d2tb00588c1.pdf [file d2tb00588c1.pdf]

## Supporting information

### Biomimetic FeCo@PDA nanozyme platform with Fenton catalytic activity as efficient antibacterial agent

Fei Kuang<sup>†a</sup>, Yingjie Chen<sup>†b</sup>, Wei Shan<sup>†b</sup>, Yonghai Li<sup>c</sup>, Xichang Bao<sup>c</sup>, Xiang Gao<sup>\*a</sup>,  
Dong An<sup>\*b</sup>, Meng Qiu<sup>\*b</sup>

<sup>a</sup> College of Life Sciences, Qingdao University, No.308 Ningxia Road, Qingdao 266071, Shandong, China

<sup>b</sup> Key Laboratory of Marine Chemistry Theory and Technology (Ocean University of China), Ministry of Education, Qingdao, 266100, P. R. China.

<sup>c</sup> CAS Key Laboratory of Bio-based Materials, Qingdao Institute of Bioenergy and Bioprocess Technology, Chinese Academy of Sciences, Qingdao 266101, China

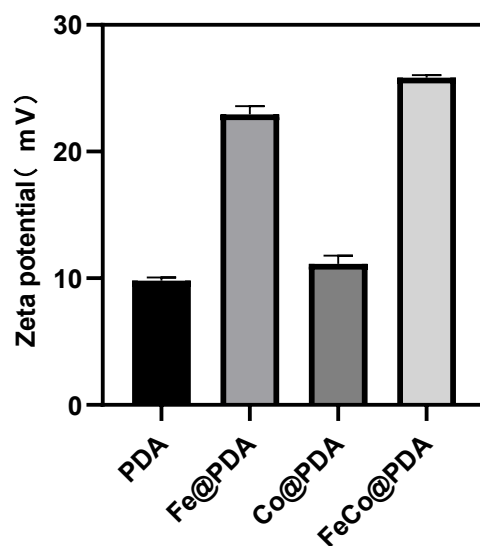

Figure S1. Zeta potential of PDA, Fe@PDA, Co@PDA and FeCo@PDA
